# Supplementary material for: Populations of Saccharomyces cerevisiae in Vineyards: Biodiversity and Persistence Associated with Terroir
Source: MDPI journal article supplement (doi:10.3390/fermentation9030292), 2023-03-17
Supplement: s1 [file s1]

**Table S1:** Nei's genetic identity matrix of the six *S. cerevisiae* grape fermentative-associated populations of the ZARM region.

|               | <b>ID_H04</b> | <b>ID_H10</b> | <b>ID_H11</b> | <b>S_H04</b> | <b>S_H10</b> | <b>S_H11</b> |
|---------------|---------------|---------------|---------------|--------------|--------------|--------------|
| <b>ID_H04</b> | *****         | 0.9746        | 0.9677        | 0.9397       | 0.7611       | 0.9532       |
| <b>ID_H10</b> | 0.0257        | *****         | 0.9820        | 0.9451       | 0.7576       | 0.9694       |
| <b>ID_H11</b> | 0.0328        | 0.0181        | *****         | 0.9428       | 0.7484       | 0.9719       |
| <b>S_H04</b>  | 0.0622        | 0.0565        | 0.0589        | *****        | 0.7386       | 0.9414       |
| <b>S_H10</b>  | 0.2729        | 0.2776        | 0.2898        | 0.3030       | *****        | 0.7990       |
| <b>S_H11</b>  | 0.0479        | 0.0311        | 0.0285        | 0.0603       | 0.2244       | *****        |

Nei's genetic identity (above diagonal) and genetic distance (below diagonal) according to Nei (1972)

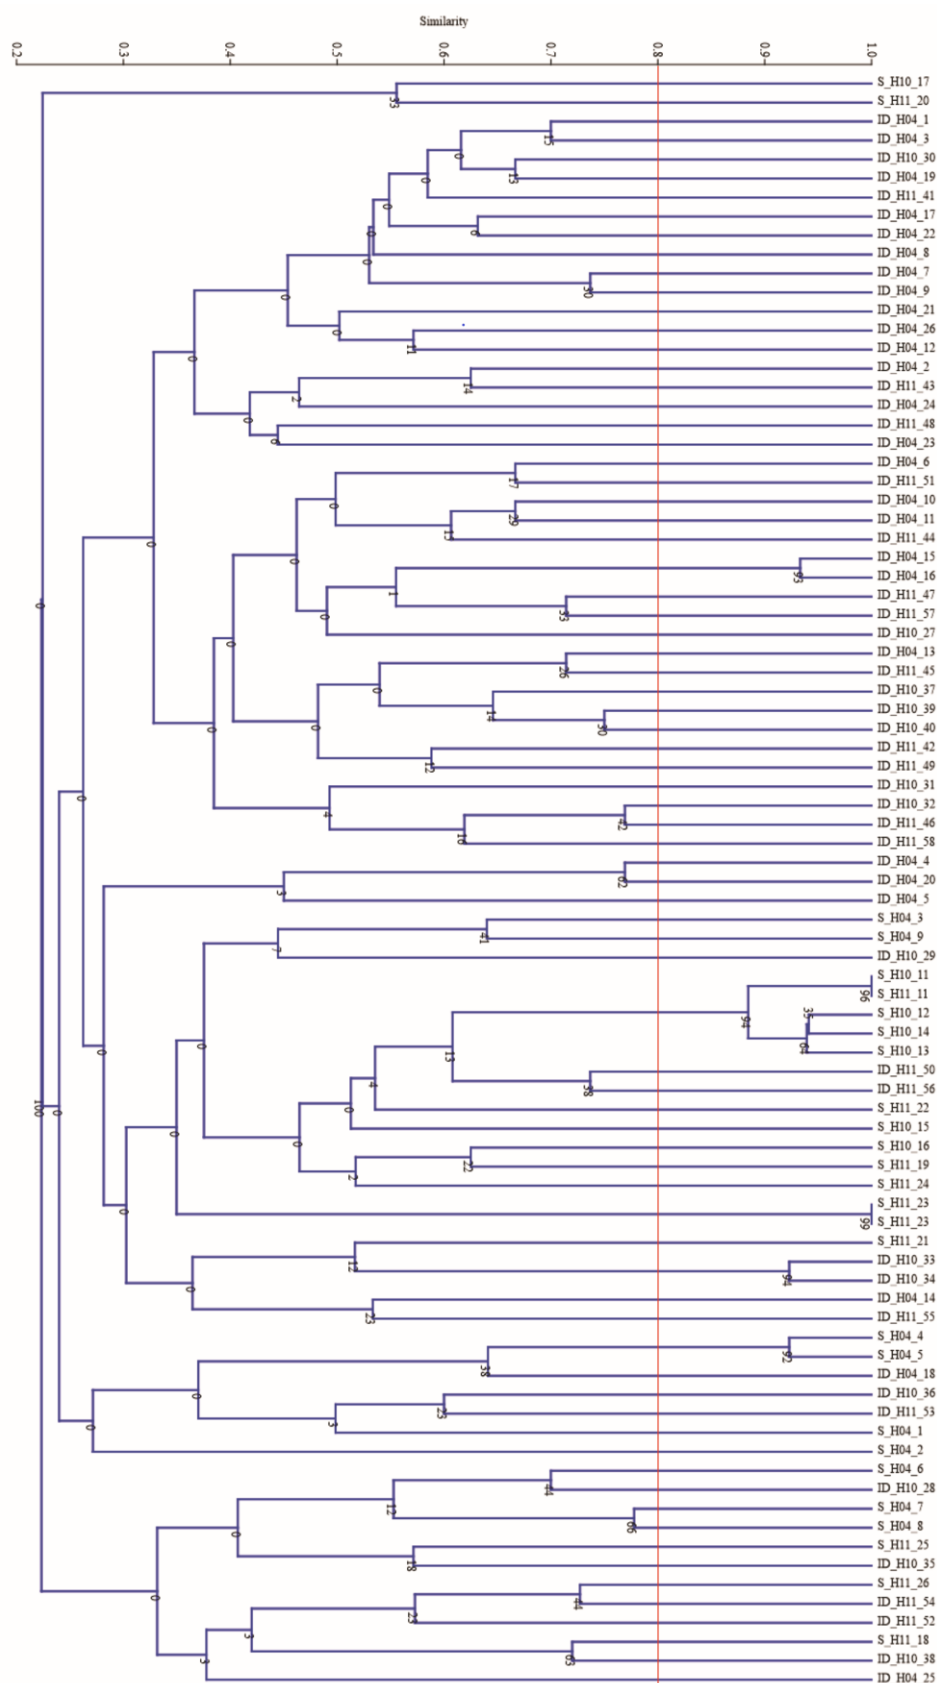

**Figure S1:** Dendrogram showing molecular relationships for 84 Interdelta-PCR patterns obtained during three harvests in two Cv. Malbec vineyards of the ZARM region. Numbers at each branch represent bootstrap values (over 100 bootstrap replicates). Cophenetic Correlation Coefficient (CP): 0.612. Patterns identification code corresponds to vineyard: ID: EEA Mendoza INTA Vineyard; S: Winery Vineyard; and vintage: H04: Harvest 2004; H10: Harvest 2010; H11: Harvest 2011.
